# Supplementary material for: Online In-Tube Solid-Phase Microextraction Coupled with Liquid Chromatography–Tandem Mass Spectrometry for Automated Analysis of Four Sulfated Steroid Metabolites in Saliva Samples
Source: MDPI journal article supplement (doi:10.3390/molecules27103225), 2022-05-18
Supplement: s1 [file s1]

## Supplementary Materials

# Online In-Tube Solid-Phase Microextraction Coupled with Liquid Chromatography–Tandem Mass Spectrometry for Automated Analysis of Four Sulfated Steroid Metabolites in Saliva Samples

Hiroyuki Kataoka \* and Daiki Nakayama

School of Pharmacy, Shujitsu University, Nishigawara, Okayama 703-8516, Japan

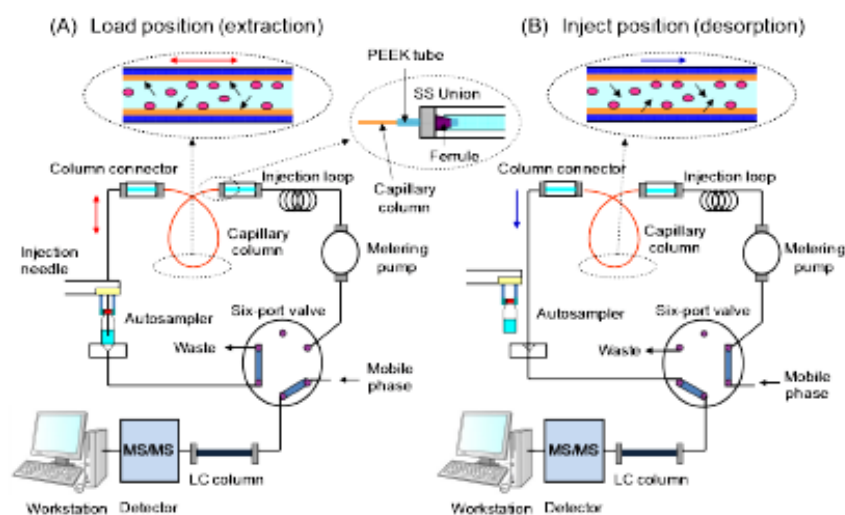

**Figure S1.** Schematic diagrams of the automated online IT-SPME/LC–MS/MS system.

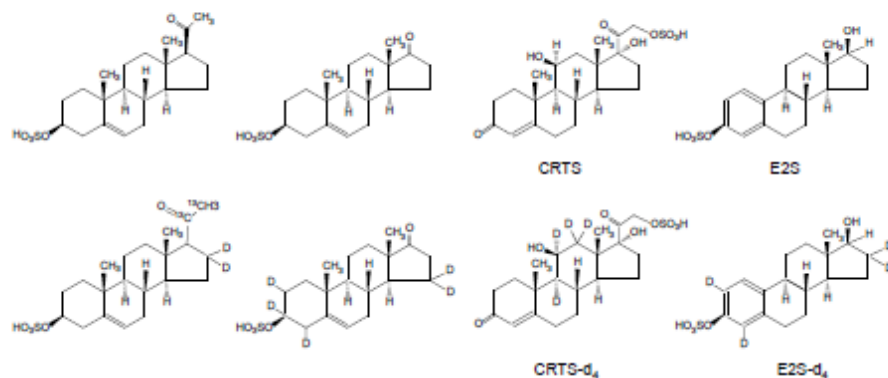

**Figure S2.** Structures of sulfated steroid metabolites and their respective stable isotope-labeled compounds as internal standards.

**Table S1.** Program for the IT-SPME process.

| Sequence | Event                                                | Switching valve | Vial   | Draw/ejection      |             |                               |
|----------|------------------------------------------------------|-----------------|--------|--------------------|-------------|-------------------------------|
|          |                                                      |                 |        | Cycle <sup>1</sup> | Volume (μL) | Speed (μL min <sup>-1</sup> ) |
| 1        | Conditioning of the capillary                        | Load            | MeOH   | D/E (2)            | 40          | 200                           |
| 2        | Drawing of air into the capillary                    | Load            | Empty  | D (1)              | 30          | 200                           |
| 3        | Conditioning of the capillary                        | Load            | Water  | D/E (2)            | 40          | 200                           |
| 4        | Extraction of analytes into the capillary            | Load            | Sample | D/E (30)           | 40          | 200                           |
| 5        | Needle washing                                       | Load            | MeOH   | D/E (1)            | 2           | 200                           |
| 6        | Desorption of analytes from the capillary            | Inject          | –      | –                  | –           | –                             |
| 7        | HPLC separation of analytes and return to sequence 1 | Load            | –      | –                  | –           | –                             |

<sup>1</sup> D: draw, E: ejection.**Table S2.** MRM transitions and setting parameters for sulfated steroid metabolites and their stable isotope-labeled compounds.

| TSNA                                                 | RT <sup>1</sup> (min) | Mass transition (m/z) | Dwell time (msec) | DP <sup>2</sup> (V) | EP <sup>3</sup> (V) | CE <sup>4</sup> (V) | CXP <sup>5</sup> (V) |
|------------------------------------------------------|-----------------------|-----------------------|-------------------|---------------------|---------------------|---------------------|----------------------|
| PREGS                                                | 3.9                   | 395.0 →96.8           | 125               | -65                 | -8                  | -65                 | -10                  |
| DHEAS                                                | 2.7                   | 367.0 →97.0           | 125               | -60                 | -8                  | -60                 | -5                   |
| CRTS                                                 | 2.1                   | 441.2 →97.0           | 125               | -65                 | -8                  | -65                 | -15                  |
| E2S                                                  | 2.3                   | 351.3 →80.1           | 125               | -65                 | -8                  | -60                 | -5                   |
| PREGS- <sup>13</sup> C <sub>17</sub> -d <sub>3</sub> | 3.9                   | 399.0 →96.8           | 125               | -65                 | -8                  | -65                 | -10                  |
| DHEAS-d <sub>3</sub>                                 | 2.7                   | 372.4 →97.4           | 125               | -60                 | -8                  | -60                 | -5                   |
| CRTS-d <sub>4</sub>                                  | 2.1                   | 445.2 →96.8           | 125               | -65                 | -8                  | -65                 | -15                  |
| E2S-d <sub>4</sub>                                   | 2.3                   | 354.7 →80.0           | 125               | -65                 | -8                  | -60                 | -5                   |

<sup>1</sup> Retention time (min)<sup>2</sup> Declustering potential (V)<sup>3</sup> Entrance potential (V)<sup>4</sup> Collision energy (V)<sup>5</sup> Collision cell exit potential (V)
